# Supplementary material for: Characterisation of Antiviral Activity of Cathelicidins from Naked Mole Rat and Python bivittatus on Human Herpes Simplex Virus 1
Source: MDPI journal article supplement (doi:10.3390/ph14080715), 2021-07-24
Supplement: s1 [file s1]

## Supplementary material

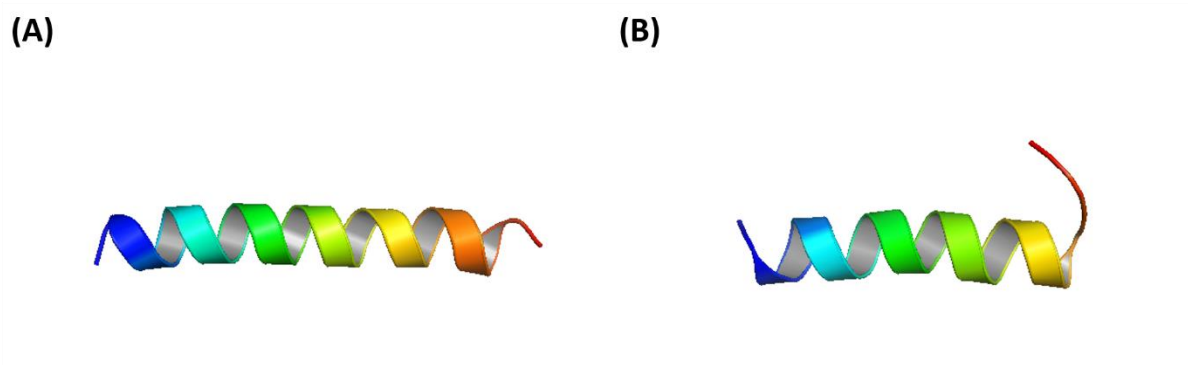

**Figure S1:** Energy-minimized 3D structure of Hg-CATH and Pb-CATH4. 3D structure of Hg-CATH (A) and Pb-CATH4 (B) were analyzed by LOMETS server and visualized by Pymol after energy minimization was conducted using Gromacs. Both peptides contain alpha-helical structure.

(A)

| Peptides    | Sequences and secondary structure predictions of mammalian cathelicidins with anti-HSV-1 activity |   |   |   |   |   |   |   |   |   |   |   |   |   |   |   |   |   |   |   |   |   |   |   |   |   |   |   |   |   |   |   |   |   |   |   |   |  |
|-------------|---------------------------------------------------------------------------------------------------|---|---|---|---|---|---|---|---|---|---|---|---|---|---|---|---|---|---|---|---|---|---|---|---|---|---|---|---|---|---|---|---|---|---|---|---|--|
| Hg-CATH     | S                                                                                                 | K | F | F | R | K | A | R | K | K | L | G | K | G | L | Q | K | I | K | N | V | L | R | K | Y |   |   |   |   |   |   |   |   |   |   |   |   |  |
|             | c                                                                                                 | h | h | h | h | h | h | h | h | h | h | h | h | h | h | h | h | h | h | h | h | h | h | h | h | c |   |   |   |   |   |   |   |   |   |   |   |  |
| Pb-CATH4    | T                                                                                                 | R | S | R | W | R | R | F | I | R | G | A | G | R | F | A | R | R | Y | G | W | R | I | A |   |   |   |   |   |   |   |   |   |   |   |   |   |  |
|             | c                                                                                                 | h | h | h | h | h | h | h | h | h | h | h | h | h | h | h | h | h | h | c | c | c | c | c |   |   |   |   |   |   |   |   |   |   |   |   |   |  |
| LL-37       | L                                                                                                 | L | G | D | F | F | R | K | S | K | E | K | I | G | K | E | F | K | R | I | V | Q | R | I | K | D | F | L | R | N | L | V | P | R | T | E | S |  |
|             | c                                                                                                 | c | h | h | h | h | h | h | h | h | h | h | h | h | h | h | h | h | h | h | h | h | h | h | h | h | h | h | h | h | h | h | h | h | h | h | h |  |
| BMAP-28     | G                                                                                                 | G | L | R | S | L | G | R | K | I | L | R | A | W | K | K | Y | G | P | I | I | V | P | I | I | R | I | G |   |   |   |   |   |   |   |   |   |  |
|             | c                                                                                                 | c | h | h | h | h | h | h | h | h | h | h | h | h | h | h | c | c | c | e | e | e | e | e | e | e | e | c | c |   |   |   |   |   |   |   |   |  |
| Indolicidin | I                                                                                                 | L | P | W | K | W | P | W | W | P | W | R | R |   |   |   |   |   |   |   |   |   |   |   |   |   |   |   |   |   |   |   |   |   |   |   |   |  |
|             | c                                                                                                 | c | c | c | c | c | c | c | c | c | c | c |   |   |   |   |   |   |   |   |   |   |   |   |   |   |   |   |   |   |   |   |   |   |   |   |   |  |

h (alpha-helix)

e (extended strand)

c (random coil)

(B)

| Peptide     | Net charge (+) | Alpha helix (%) | Extended strand (%) | Random coil (%) |
|-------------|----------------|-----------------|---------------------|-----------------|
| Hg-CATH     | 11             | 92              | 0                   | 8               |
| Pb-CATH4    | 9              | 75              | 0                   | 25              |
| LL-37       | 6              | 73              | 0                   | 27              |
| BMAP-28     | 8              | 50              | 25                  | 25              |
| Indolicidin | 4              | 0               | 0                   | 100             |

**Figure S2:** Comparison of sequences and secondary structure predictions of five cathelicidins with anti-HSV-1 activity. The sequence-dependent peptide characteristics of the peptides were analysed such as length, hydrophobicity, amphipathicity, net charge and helicity.

**Table S1 : The sequence similarity of five cathelicidins with anti-HSV-1 activity.**

|                 | <b>Hg-CATH</b> | <b>Pb-CATH4</b> | <b>LL-37</b> | <b>BMAP-28</b> | <b>Indolicidin</b> |
|-----------------|----------------|-----------------|--------------|----------------|--------------------|
| <b>Hg-CATH</b>  | 100            | 20              | 32           | 17             | 0                  |
| <b>Pb-CATH4</b> | -              | 100             | 14           | 25             | 12                 |
| <b>LL-37</b>    | -              | -               | 100          | 16             | 5                  |
| <b>BMAP-28</b>  | -              | -               | -            | 100            | 10                 |

Note. Global alignment analysis was performed using National Center for Biotechnology Information Search database (NCBI).
